# Supplementary material
Source: PubMed Central journal article supplement (PMC2581577)

**Supplemental Figure 1. LMW-HA stimulates S phase entry in human SMCs.** *A*, Quiescent human vascular SMCs were incubated with 0.1% FBS for selected times in the absence or presence of LMW-HA (200 µg/ml) or with 10% FBS. BrdU was added with 0.1% FBS and LMW-HA and remained throughout the incubation. BrdU incorporation into nuclei was determined by immunofluorescence microscopy. *B*, Quiescent human vascular SMCs were incubated with 0.1% FBS for 48 h in the presence of increasing concentrations of LMW-HA. A blocking antibody specific for human CD44 (5F12) or an isotype-matched irrelevant antibody was added for the duration of the experiment. BrdU incorporation into nuclei was determined as in *A*. *C*, Quiescent human vascular SMCs were incubated with or without 0.1% FBS in the presence or absence of LMW-HA for 24-48 h. BrdU incorporation was determined as in *A*. *D*, Cells in panel *C* that had been incubated for 24 h were stained with fluorescein-phalloidin. Scale bar=20 microns.

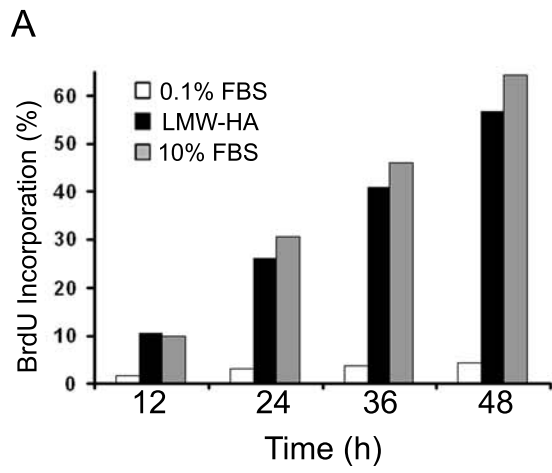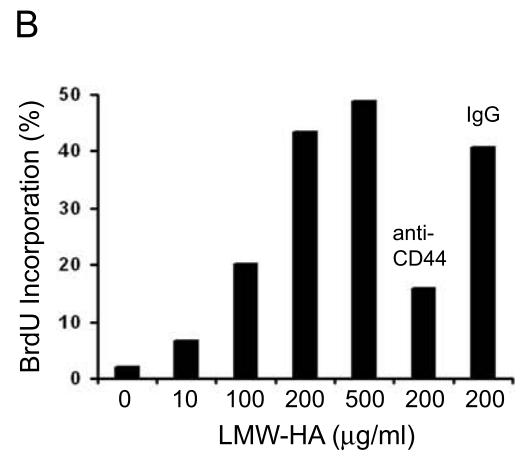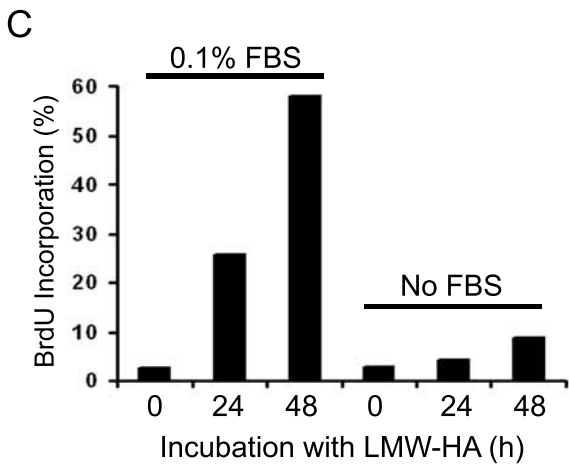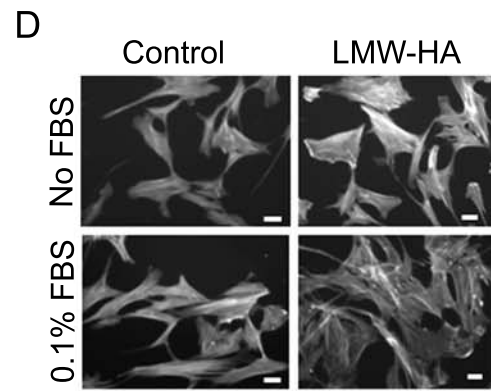

Supplement: M802934200_1.pdf [file M802934200_1.pdf]
